# Supplementary material
Source: publisher figshare collection journal article supplement (https://gsapubs.figshare.com/articles/dataset/_/12533567)
Supplement: Supplementary file 1 [file 1]

## Sheet: data
Table DR1. Trace element data (in ppm) and Nd-Pb isotope composition of the Santorini and Nisyros samples
	sample	unit*	UTM E**	UTM N**	Li	Be	Sc	Ti	V	Cr	Co	Ni	Cu	Ga	Rb	Sr	Y	Zr	Nb	Mo	In	Cs	Ba	La	Ce	Pr	Nd	Sm	Eu	Gd	Tb	Dy	Ho	Er	Tm	Yb	Lu	Hf	Ta	W	Tl	Pb	Bi	Th	U	143Nd/144Nd	2 SE	206Pb/204Pb	2 SE
SANTORINI	AAS-006	apa	355835	4023870	11.347	0.988979	35.1312	5312.05	112.752	341.814	34.3151	112.205	64.6032	16.3647	44.3133	187.041	28.7073	140.145	6.08746	0.27716	0.126542	1.42001	216.81	15.4511	32.0382	3.84955	15.8359	3.70831	1.0356	4.31304	0.733342	4.66363	1.00189	3.02425	0.471179	3.08178	0.469037	3.52891	0.518157	0.613566	0.4367	8.16343	0.0288628	7.92799	2.31858	0.51269	9e-06	18.8835	0.000515543
	AAS-010	apa	355990	4023670	10.4988	1.05569	32.4014	5506.78	122.583	102.258	27.9868	47.8757	44.2874	16.9953	45.4827	198.922	29.2506	144.335	6.18026	0.274616	0.114291	1.44576	224.301	15.6967	32.4634	3.95426	16.2116	3.90019	1.06944	4.44111	0.747321	4.83114	1.02949	3.13485	0.480494	3.1999	0.477304	3.67685	0.461401	0.624376	0.626158	8.81849	0.0333724	8.14234	2.39221	0.512696	6e-06	18.89	0.000593303
	AAS-012	apa	356139	4025330	7.41925	0.585821	36.593	5636.02	224.308	120.325	34.1526	60.6459	58.9826	16.8184	12.8917	248.596	22.366	72.1054	3.19884	0.131375	0.114763	0.430768	104.379	6.81204	15.3614	2.09882	9.7589	2.69943	0.979279	3.35037	0.583734	3.81723	0.797181	2.4146	0.363823	2.4287	0.359288	1.90546	0.407379	0.151701	0.0994955	2.63729	0.0156607	1.55851	0.458213	0.512852	6e-06	18.8763	0.000643533
	AAS-013	apa	356085	4025330	7.90906	0.561294	36.89	5729.29	173.964	120.472	34.5913	60.7343	55.0619	17.2501	12.151	249.714	22.8323	74.8316	3.37014	0.0877317	0.103038	0.211692	115.73	7.50112	16.6202	2.2256	10.1718	2.80177	1.01309	3.39525	0.587666	3.89789	0.797753	2.46563	0.372173	2.46303	0.364577	1.99686	0.231596	0.143482	0.0942051	2.50959	0.0247427	2.00929	0.49994	0.512825	8e-06	18.9113	0.000493523
	AAS-022	as2	358357	4033081	15.4332	1.20213	30.7144	6442.1	140.645	99.6439	22.605	30.0262	70.1692	16.3358	50.7661	179.45	39.2191	172.753	5.96458	0.380369	0.142989	1.54974	213.364	15.1589	34.4792	4.60925	20.0593	5.23827	1.38156	6.17168	1.05448	6.87413	1.46651	4.48731	0.698936	4.49037	0.668594	4.96928	0.5192	0.715153	0.430755	8.23882	0.0285247	9.79583	3.14128	0.512812	5e-06	18.8955	0.000802963
	AAS-034	rp3	355876	4025425	8.62208	0.818685	31.5908	5384.23	187.972	31.335	22.4483	23.4761	28.0341	17.2202	25.9253	244.898	29.2796	101.207	5.85319	0.223013	0.120699	0.512815	177.529	12.1396	26.1068	3.37033	14.8403	3.75827	1.25942	4.36572	0.721908	4.74455	0.985861	2.9398	0.442731	2.81441	0.41822	2.47172	0.382669	0.175741	0.301532	10.3251	0.0239365	4.17808	1.2839	0.512764	5e-06	18.9255	0.000590949
NISYROS	AAN-002	enc-nlf	518699	4049277	26.791	1.05402	25.2396	5359.54	219.335	1.58196	28.5657	8.29794	26.4756	18.5688	23.6874	725.198	21.9255	112.632	8.98768	0.388731	0.13293	0.913868	264.473	16.874	34.8432	4.51261	18.5331	3.88528	1.23344	3.72189	0.593037	3.65293	0.739178	2.17114	0.323086	2.03331	0.311056	2.5784	0.486371	0.177374	0.261965	6.84813	0.00996002	2.26461	0.686167	0.512803	8e-06	18.703	0.000591661
	AAN-007	enc-nlf	517260	4048667	14.8809	0.827635	23.5664	4048.02	178.233	5.99536	24.1332	11.9313	13.0698	15.434	17.2862	619.473	17.0847	82.69	6.5318	0.133437	0.121656	0.279128	226.4	11.6128	24.1405	3.09587	13.0877	2.85312	0.962533	2.83893	0.455325	2.80859	0.579311	1.6795	0.254651	1.62068	0.235891	1.98351	0.342663	0.0915541	0.304324	3.26235	0.0170331	1.4679	0.447356	0.512828	4.45461e-06	18.6134	0.000591613
	AAN-013	ho	511664	4051676	8.20971	1.02964	21.16	3326.13	138.368	90.418	21.4675	51.6418	50.803	17.265	20.7796	903.548	15.0642	109.15	6.05926	0.290657	0.10006	0.633627	258.717	12.9744	28.3768	3.55379	14.8136	3.08946	0.964267	2.89997	0.428025	2.53774	0.503883	1.45431	0.2118	1.37509	0.198127	2.70817	0.34973	0.153486	0.197441	6.73942	0.0381258	2.53895	1.19329	0.512757	4.78664e-06	18.5913	0.00059709
	AAN-016	lf4	516191	4050133	7.82941	0.824895	24.405	3571.73	172.768	246.064	28.7459	104.581	59.9924	15.1238	17.2685	567.217	15.5454	94.0671	6.14292	0.199343	0.0989379	0.383656	258.575	10.0858	21.2264	2.67552	11.3189	2.59148	0.8496	2.73048	0.409864	2.59409	0.513265	1.49564	0.229592	1.46202	0.220671	2.29248	0.360831	0.249421	0.162143	3.50297	0.00524633	1.96683	0.666801	0.512742	6e-06	18.6484	0.000763447
	AAN-023	blf	512587	4049494	11.9606	1.1981	25.0895	4112.39	166.861	45.9774	18.2955	27.4464	40.2287	17.5333	30.3734	517.797	22.3513	144.882	9.98866	0.29579	0.111609	0.849884	372.189	19.7533	38.978	4.5589	17.9162	3.63162	1.10374	3.53473	0.542834	3.49658	0.716718	2.11365	0.326024	2.1299	0.326658	3.17167	0.554208	0.385809	0.237236	5.51687	0.0354836	3.30956	0.994777	0.512719	7e-06	18.6526	0.000684931
	AAN-025b	enc-pfi	514382	4050605	15.4282	0.92673	20.6229	4007.28	133.777	12.3652	21.6764	26.1321	25.8466	18.6541	12.8527	985.619	16.9837	109.844	6.53791	0.119278	0.13772	0.265643	236.77	12.7462	29.4332	3.7277	15.8041	3.33814	1.06568	3.08587	0.450019	2.80135	0.544122	1.58208	0.236329	1.49127	0.23143	2.60815	0.340205	0.15194	0.340344	3.36043	0.0350028	1.78452	0.532074	0.512729	6e-06	18.7438	0.00059671
	AAN-041	enc-pfi	515213	4049843	7.94897	0.82917	19.3317	3442.9	140.702	12.9988	21.445	25.7475	24.7755	17.6352	10.1974	959.155	16.4541	98.7048	5.87626	0.100417	0.0853767	0.198305	213.126	12.1041	27.1741	3.60866	15.2949	3.25246	1.03726	3.04083	0.446359	2.71268	0.541135	1.59253	0.229848	1.43451	0.214947	2.40908	0.310839	0.0847967	0.153796	3.97155	0.00709929	1.50532	0.507105	0.512727	5e-06	18.7411	0.000689717
	AAN-043b	enc-xlf	516115	4050496	21.3349	0.954106	23.4172	2801.14	122.065	78.6829	19.6486	45.2626	31.7982	16.3224	24.5665	437.367	15.9285	85.33	7.14148	0.204649	0.0640375	0.586416	253.94	13.0211	25.3252	2.90298	11.3944	2.41231	0.811346	2.53326	0.401061	2.58036	0.529026	1.55373	0.232944	1.49581	0.229393	1.97457	0.460214	0.223359	0.134901	9.16	0.0157635	3.26063	0.857818	0.512659	6e-06	18.707	0.000564564
	AAN-047	lf4	514234	4050667	7.99813	0.800702	19.4083	3096.7	135.066	155.007	25.6236	102.716	44.0754	16.3254	14.9023	947.022	14.3476	95.7075	5.12404	0.128484	0.0839494	0.245504	224.327	11.897	26.1757	3.37606	14.0906	2.92386	0.938212	2.72822	0.393846	2.36781	0.473997	1.33911	0.200502	1.22054	0.190382	2.40588	0.289984	0.109963	0.0883716	2.96706	0.0324791	2.08453	0.681077	0.512784	6e-06	18.6051	0.00169775
	AAN-048a	enc-lf7	518557	4049767	21.6178	1.27541	23.2239	4846.76	172.134	5.64318	22.2514	17.1357	24.7185	17.1814	31.1277	514.224	22.0252	123.474	11.0125	0.270865	0.132037	1.12459	316.6	16.8735	34.1798	4.04239	16.3804	3.54247	1.06536	3.50282	0.565864	3.57267	0.715261	2.16633	0.32148	2.08788	0.308326	2.80826	0.643409	0.321799	0.326313	8.20252	0.0106604	3.92294	1.14147	0.512633	8e-06	18.752	0.00105208
	AAN-051	pa	518211	4049797	14.7471	0.995325	28.1528	4441.02	177.473	153.591	24.2122	67.5819	58.7639	15.9278	31.3678	389.47	20.6138	114.697	8.48362	0.322936	0.108111	0.722411	295.988	15.0748	29.5693	3.49863	13.9408	2.96906	0.932637	3.15116	0.519627	3.25481	0.676362	2.00977	0.299778	1.98535	0.304484	2.63072	0.528865	0.321284	0.27994	6.64864	0.0254363	3.582	1.04805	0.512747	3e-06	18.7217	0.000544004
	*unit	Santorini:	Druitt, T. H., Edwards, L., Mellors, R., Pyle, D., Sparks, R., Lanphere, M., Davies, M., and Barreirio, B., 1999, Santorini volcano, London, Geological Society Memoir.
		Nisyros:	Volentik, A., Principe, C., Vanderkluysen, L., and Hunziker, J. C., 2005, Explanatory notes on the "Geological Map of Nisyros Volcano (Greece)", in Hunziker, J. C., and Marini, L., eds., The Geology, Geochemistry and Evolution of Nisyros Volcano (Greece). Implications for the Volcanic Hazards: Lausanne, p. 7-25.
	** UTM WGS84, zone 35S
[truncated: 4 more columns]

## Sheet: standards
	Results for internal and external USGS reference materials
	BCR-2 (n=12)			BHVO-2 (n=7)
	average (ppm)	2 SD (%)		average (ppm)	2 SD (%)			206Pb/204Pb	2 SD	207Pb/204Pb	2 SD	208Pb/204Pb	2 SD
Li	9.79477	6.85815		4.74285	5.31947		NBS981 (n = 36)	16.9409	0.000821014	15.4983	0.000874223	36.7213	0.00235196
Be	2.25717	19.7914		1.11309	21.703		BCR-2 (n = 5)	18.7643	0.00720831	15.6272	0.00265687	38.7455	0.014483
Sc	32.8051	12.686		30.5693	11.4465		AGV-1 (n = 4)*	18.94	0.000585334	15.6557	0.000495808	38.5608	0.00111875
Ti	12812.8	13.4339		16670.8	15.5587		BCR-1 (n = 4)*	18.8217	0.000525584	15.6375	0.000437881	38.7297	0.00131687
V	408.617	5.29492		313.097	6.90307
Cr	14.6407	9.65648		283.321	7.24259
Co	36.5093	4.61179		43.8225	6.93987			143Nd/144Nd	2 SD
Ni	11.8216	6.43403		116.277	6.64609		SIGO** (n = 18)	0.51133	7.77796e-06
Cu	24.9099	10.6529		131.973	6.15862		BCR-2 (n = 9)	0.51263	2.04051e-05
Ga	20.9854	4.86127		20.2774	6.98631		AGV-2 (n = 9)	0.512785	7.77674e-06
Rb	48.5989	4.76968		9.4731	7.21163		BHVO-2 (n = 4)	0.512978	1.15925e-06
Sr	330.464	6.55752		382.476	6.74501
Y	36.985	5.00944		27.3594	9.09937		* data from: Klaver, M., Smeets, R., Koornneef, J. M., Davies, G., and Vroon, P., 2015, Pb isotope analysis of ng size samples by TIMS equipped with a 1013 Ω resistor using a 207Pb-204Pb double spike: Journal of Analytical Atomic Spectrometry.
Zr	189.992	4.58596		173.982	6.25216		** in-house standard
Nb	12.7777	4.87223		18.9481	6.33066
Mo	69.1317	12.5389		1.1545	18.9422
In	0.204532	20.1925		0.178493	14.821
Cs	1.08716	18.8583		0.0925362	10.1394
Ba	667.148	4.84912		125.933	7.11982
La	24.3666	4.79777		14.6668	6.17209
Ce	51.7023	4.50611		36.2479	6.0436
Pr	6.56982	4.7631		5.07452	6.52873
Nd	27.9059	4.74283		23.5627	5.9018
Sm	6.34759	4.93155		5.80555	6.94709
Eu	1.92649	3.38434		1.99887	5.93434
Gd	6.53872	4.34177		6.00789	6.28059
Tb	1.02507	5.13171		0.899733	5.5496
Dy	6.22256	5.56605		5.1167	7.24982
Ho	1.24231	4.80174		0.930948	7.11649
Er	3.58714	4.82225		2.43032	6.9087
Tm	0.520506	4.61012		0.325368	5.92132
Yb	3.28366	6.16631		1.92681	7.45586
Lu	0.485363	5.80255		0.259651	7.65616
Hf	4.632	5.13262		4.1045	6.86846
Ta	0.824122	13.5227		1.14839	6.30708
W	0.396565	50.6332		0.188808	43.3421
Tl	0.726531	19.5122		0.0546096	19.4989
Pb	11.2658	24.3208		1.51584	35.031
Bi	0.0634296	26.6837		0.0149502	26.0739
Th	5.9931	4.98126		1.19346	7.24762
U	1.64253	3.74642		0.404421	4.22631
Zr/Nb	14.8695	0.897703		9.1823	1.36349
Zr/Hf	41.0224	2.37733		42.3945	2.53224
Th/Yb	1.82561	3.24824		0.619543	4.23149
Nb/Yb	3.89242	3.27218		9.83684	3.43853
